# Supplementary material for: Cancer-associated rs6983267 SNP and its accompanying long noncoding RNACCAT2induce myeloid malignancies via unique SNP-specific RNA mutations
Source: HighWire-hosted journal article supplement (doi:10.1101/gr.225128.117), 2018-03-22
Supplement: Supplemental_Materials.docx [file Supplemental_Materials.docx]

**SUPPLEMENTAL MATERIALS**

**Cancer-associated rs6983267 SNP and its accompanying long non-coding RNA *CCAT2* induce myeloid malignancies via unique SNP-specific RNA mutations**

*Maitri Y. Shah, Manuela Ferracin, Valentina Pileczki, Baoqing Chen, Roxana Redis, Linda Fabris, Xinna Zhang, Cristina Ivan, Masayoshi Shimizu, Cristian Rodriguez-Aguayo, Mihnea Dragomir, Katrien Van Roosbroeck, Maria Ines Almeda, Maria Ciccone, Daniela Nedelcu, Maria Angelica Cortez, Taghi Manshouri, Steliana Calin, Muharrem Muftuoglu, Pinaki P. Banerjee, Mustafa H. Badiwi, Jan Parker-Thornburg, Asha Multani, James William Welsh, Marcos Roberto Estecio, Hui Ling, Ciprian Tomuleasa, Delia Dima, Hui Yang, Hector Alvarez, M. James You, Milan Radovich, Elizabeth Shpall, Muller Fabbri, Katy Rezvani, Leonard Girnita, Ioana Berindan-Neagoe, Anirban Maitra, Srdan Verstovsek, Riccardo Fodde, Carlos Bueso-Ramos, Mihai Gagea, Guillermo Garcia Manero, George A. Calin*

**Supplemental Tables**

**Supplemental Table 1:** Primers, probes and antibodies used in this study.

**A**

| **Primers** | **Sequence** | **Description** |
| --- | --- | --- |
| CCAT2_1F | AGCCTCGAGCCGAGGTGATCAGGTGGACTTTC | PCR Primer |
| CCAT2_1R | AGCCCCGGGGTCTTCTGGGCTGATGTTGC | PCR Primer |
| CCAT2_2F | TTTAGCAGCTGCATCGCTCCATAG | PCR Primer |
| CCAT2_2R | CTGGGCAGTTGAGAAACGAGAACA | PCR Primer |
| CCAT2_3F | CAGGTGGACTTTCCTGGATGT | PCR Primer |
| CCAT2_3R | CGCCTTCATTTCCCAGATGC | PCR Primer |
| CCAT2_4F | CCCTGGTCAAATTGCTTAACCT | PCR Primer |
| CCAT2_4R | TTATTCGTCCCTCTGTTTTATGGAT | PCR Primer |
| HPRT_1F | TGACACTGGCAAAACAATGCA | PCR Primer |
| HPRT_1R | GGTCCTTTTCACCAGCAAGCT | PCR Primer |
| B2M_1F | CACCCCCACTGAAAAAGATGAG | PCR Primer |
| B2M_1R | CCTCCATGATGCTGCTTACATG | PCR Primer |
| CCAT2 probe F | TTTAGCAGCTGCATCGCTCCATAG | Southern blot |
| CCAT2 probe R | CTGGGCAGTTGAGAAACGAGAACA | Southern blot |

**B**

| **Antibodies** | **Use** | **Company** | **Catalogue Number** |
| --- | --- | --- | --- |
| CD34 | Flow cytometry | eBioscience | 11-0341-81 |
| CD16/32 | Flow cytometry | eBioscience | 12-0161-81 |
| c-Kit | Flow cytometry | Tonbo | 20-1172-U025 |
| Sca-1 | Flow cytometry | eBioscience | 45-5981-80 |
| CD135 | Flow cytometry | Biolegend | 135305 |
| IL-7RA | Flow cytometry | Biolegend | 135017 |
| CD268 | Flow cytometry | Biolegend | 134103 |
| CD79b | Flow cytometry | Biolegend | 132807 |
| Lin Ter119 | Flow cytometry | Biolegend | 116223 |
| Lin GR-1 | Flow cytometry | Tonbo | 25-1276-U025 |
| Lin CD11b | Flow cytometry | Tonbo | 25-0112-U025 |
| Lin B220 | Flow cytometry | Biolegend | 103223 |
| Lin IgM | Flow cytometry | Biolegned | 406515 |
| Ghost Dye 510 | Flow cytometry | Tonbo | 13-0870-T100 |
| EZH2 | RIP, western blots | Millipore | 17-662 |
| H3K27Me3 | Western blots | CellSignaling | 9733 |
| Histone 3 | Western blots | CellSignaling | 14269 |
| Vinculin | Western blots | CellSignaling | 4650 |
| GAPDH | Western blots | CellSignaling | 2118 |
| EZH2 | Immunohistochemistry | CellSignaling | 5246 |

**Supplemental Table 2:** Clinical information of the patients used in this study.

| **MDACC cohort: Bone marrow CD34+ cells** | |
| --- | --- |
| MDS patients | 86 |
| Gender | 56 male, 24 female, 6 missing |
| Age | 66 years median, 29-89 years range, 6 not available |
| MPN patients | 32 |
| Normals | 8 |
| MDS classification |  |
| AML/RAEBT | 5 |
| RA | 6 |
| RAEB | 42 |
| RARS | 2 |
| RCMD | 21 |
| RCMD-RS | 4 |
| Trisomy 8 | 17 |
| Outcome |  |
| AML transformation | 12/80, 6 not available |
| Outcome | 36 alive, 44 dead, 6 not available |
|  | |
| **ROM cohort: Peripheral blood mononuclear cells** | |
| MDS patients | 53 |
| Gender | 25 male, 28 female |
| Age | 67 years median, 30-93 years range |
| Normals | 57 |
| MDS classification |  |
| CMML | 6 |
| RA | 28 |
| RAEB | 11 |
| RARS | 8 |

**Supplemental Figure Legends**

**Supplemental Fig. 1**: **Generation of *CCAT2* transgenic mice**

**(A)** PCR analysis using the genomic tail DNA to genotype the founders. Three human CCAT2-specific primer pairs were used to genotype the pups. WT C57BL/6 mouse gDNA spiked with CCAT2-transgene vector at 5 copy number was used as positive controls (PC). WT C57BL/6J mouse gDNA without the transgene was included as negative control (NC). **(B)** Southern blot analysis using 5μg of gDNA digested with PshA1 enzyme (liberating a 4.5-kb transgene product) and a 303-bp specific probe was used to detect CCAT2. WT C57BL/6J mouse gDNA was used as negative control (lane 2). Copy number standards (lanes 3, 4, 5, 6 and 7 represent 1, 5, 10, 25 and 50 copy numbers respectively) were included to determine the copy number in the founders. Five positive founders initially identified with PCR were confirmed (lanes 8-12). **(C)** Sanger sequencing to confirm that *CCAT2-G* mice contained only the ‘G’ DNA allele, while *CCAT2-T* mice contained only the ‘T’ DNA allele of the SNP. **(D)** Semiquantitative end-point PCR using human *CCAT2*-specific primers to detect expression of *CCAT2* transcript in the founders. The *CCAT2* primers used (see **Supplemental Table 1A** for sequence information) detect a ~1.7kb transcript which has ~82% homology between human and murine *CCAT2*. As a result, we also detect some murine *CCAT2* using these primers. **(E)** RT-qPCR to detect expression of *CCAT2* in different organs of *CCAT2-G* and *CCAT2-T* mice. Data normalized to WT C57BL/6J mice. **(F)** Expression of *CCAT2* transcript in total bone marrow cells of *CCAT2-G* and *CCAT2-T* mice from different founders by RT-qPCR using human-specific primers. **(G-H)** In situ hybridization using human *CCAT2*-specific probe to detect *CCAT2* in bone marrow (G) and spleen (H) of *CCAT2-G* and *CCAT2-T* mice. Data are represented as mean values ± Standard deviation (STD) of n > 5 mice analyzed for each founder.

**Supplemental Fig. 2: *CCAT2* mice display MDS/MPN-like features, with bone marrow** **hyperplasia, splenomegaly and hepatomegaly**

**(A-B)** PB counts of *CCAT2-G*, *CCAT2-T* and WT mice. **(C)** Representative H&E staining section images of *CCAT2-G*, *CCAT2-T* and WT mice showing multi-lineage bone marrow hypercellularity. **(D)** Spleen-to-body-weight ratio (left panel) and liver-to-body-weight ratio (right panel) of *CCAT2-G*, *CCAT2-T* and WT mice displaying MDS or MPN-like phenotype. **(E)** Representative images of spleen from a WT and a MPN-like *CCAT2* mice (upper panel). Histological examination revealed non-physiological extramedullary hematopoiesis (EMH) with large numbers of hematopoietic precursor cells in the red pulp throughout the entire spleen (lower left panel). Similar but lower extent of EMH was also observed in the liver, which is not normally present in mice of this age (lower right panel). **(F-K)** Representative pictures of Perl’s iron staining to detect iron deposition (F), Periodic acid-Schiff staining (G), Myeloperoxidase (MPO) staining (H), butyrate staining (I), reticulin staining (J), and trichome staining (K) in *CCAT2* mice. **(L)** Incidence of MDS and MPN in *CCAT2-G* and *CCAT2-T* mice. Data are represented as median values ± 95% confidence interval. **p* < 0.05; ***p* < 0.01; ****p* < 0.001; *****p* < 0.0001.

**Supplemental Fig. 3: Bone marrow cells of *CCAT2* mice display genomic instability.**

**(A)** Genomic instability analysis on bone marrow cells of WT, *CCAT2-G* and *CCAT2-T* mice. Upper panel: Representative images of metaphase spreads from *CCAT2-G* and *CCAT2-T* mice with arrows indicating the aberrations as described. Lower panel: Quantification of abnormal mitosis in bone marrow cells of WT, *CCAT2-G* and *CCAT2-T* mice. **(B-C)** WT, *CCAT2-G* and *CCAT2-T* bone marrow sections were immunostained for Ki67 (proliferation marker, panel B) and TUNEL assay (apoptosis marker, panel C). Quantification of n = 5 for each group after Ki67 and TUNEL staining is also shown. Data are represented as mean values ± SEM. **p* < 0.05; ***p* < 0.01; ****p* < 0.001.

**Supplemental Fig. 4: *CCAT2* mice show increased incidence of MPN with age.**

**(A)** Peripheral blood counts of 4-6 months old WT, *CCAT2-G* and *CCAT2-T* mice. **(B)** Histologic sections of bone marrow (from femur) of 4-6 months old WT, *CCAT2-G* and *CCAT2-T* mice with H&E staining; 40x magnified. **(C)** Peripheral blood counts of 15-18 months old WT, *CCAT2-G* and *CCAT2-T* mice. **(D)** Histologic sections of bone marrow (from femur) of 15-18 months old WT, *CCAT2-G* and *CCAT2-T* mice with H&E staining; 40x magnified. **(E-G)** Mass cytometry (CyTOF) analysis on the bone marrow cells of 4-6 months old, 7-9 months old and 15-18 months old WT, *CCAT2-G* and *CCAT2-T* mice (n = 3 for each age and each group) showing percentage of myeloid, erythroid and lymphoid cells in 4-6 months old mice (E), percentage of CD34+ blast cells in 4-6 months old mice (F) and distribution of immature and mature hematopoietic cells in 4-6 months old, 7-9 months old and 15-18 months old mice (G). **(H)** Incidence of MDS or MPN in *CCAT2-G* and *CCAT2-T* mice with age. Data are represented as mean values ± SEM. **p* < 0.05; ***p* < 0.01; ****p* < 0.001.

**Supplemental Fig. 5: Incidence of rs6983267-specific RNA editing (RE) in MDS/MPN patients and *CCAT2* mice**

**(A)** Schematic of allele-specific restriction digestion for detection of rs6983267-specific RE in MDS patient samples and *CCAT2* mice. **(B)** Schematic depicting the rule followed to identify RE-positive (RE+) cases. **(C)** Allele-specific restriction digestion on cDNA from CD34+ bone marrow cells of MDS patients to identify RE+ cases. **(D)** Allele-specific restriction digestion on cDNA from peripheral blood cells of MDS patients to identify RE+ cases. **(E-F)** Allele-specific restriction digestion on gDNA (E) and cDNA (F) from bone marrow cells of *CCAT2* mice to identify RE+ cases. **(G)** Digital droplet PCR (ddPCR) analysis on gDNA and cDNA from total BM samples from 2 RE- and 1 RE+ mice samples.

**Supplemental Fig. 6: *CCAT2* regulates rs6983267-specific RNA editing (RE) in MDS/MPN patients by altering transcriptional activity**

**(A)** Heatmap representing downstream Ezh2 target genes that were significantly up-regulated (in red) and down-regulated (in green) in bone marrow cells of *CCAT2* RE+ *vs.* RE- mice or RE+ *vs.* WT mice (p ≤ 0.05, Fold change ≥ 1.5). **(B)** Scatter plots representing genes that were significantly up-regulated (in red) and down-regulated (in blue) in bone marrow cells of MDS-like or MPN-like mice compared to WT mice (p ≤ 0.05, Fold change ≥ 1.5). **(C)** Pie diagrams depicting the top differentially regulated pathways, grouped according to their molecular function, in bone marrow cells of MDS-like mice compared to MPN-like mice. **(D)** Top canonical pathways altered in bone marrow cells of MDS-like mice compared to MPN-like mice, which are grouped according to their molecular function, as determined by Ingenuity Pathway Analysis. **(E)** Top transcription-related canonical pathways altered in bone marrow cells of RE+ mice compared to RE- and WT mice, which are grouped according to their molecular function, as determined by Ingenuity Pathway Analysis. Papers citing these genes in myeloid malignancies are listed.

**Supplemental Fig. 7: *CCAT2* regulates EZH2 *in vitro* and *in vivo*.**

**(A)** Western blot analysis on allele-specific *CCAT2* overexpressing MEF and HEK293 cell lines. **(B)** Venn diagram (upper panel) and heatmap (lower panel) representing immune genes that were significantly up-regulated (in red) and down-regulated (in green) in hematopoietic stem and progenitor cells (HSPCs) from WT (n = 4), RE- (n = 3) and RE+ (n = 5) mice using nCounter PanCancer Immune Profiling Panel (Nanostring Technologies, Inc). **(C)** RT-qPCR showing *Ezh2* mRNA expression levels in BM cells of *CCAT2* and WT mice. **(D)** RT-qPCR for *CCAT2* expression in *CCAT2*- and EZH2-co-transfected HEK293 cells following RNA Immuno-Precipitation by EZH2 antibody. *HOTAIR* was used as a positive control and *B2M* as a negative control for EZH2 interaction. All expression levels were normalized to input. **(E)** Western blot analysis on allele-specific *CCAT2* overexpressing SET2 cell lines. TCF7L2 was used as a positive control and B-Actin as a negative control for *CCAT2* interaction. **(F)** Correlation between *CCAT2* levels (obtained by *in situ* hybridization) and EZH2 protein levels (determined by immunohistochemistry) in BM of MDS patients. **(G)** Western blot analysis showing Ezh2 protein levels (upper panel) and RT-qPCR showing *Ezh2* mRNA expression levels (lower panel) in BM cells of *CCAT2-*RE+, *CCAT2*-RE- and WT mice. Data are represented as mean values ± SEM. **p* < 0.05; ***p* < 0.01; ****p* < 0.001.

**Supplemental Methods**

## Hematological measurements and peripheral blood morphology

Blood was collected from tail vein for hematological measurements. Peripheral blood cell counts were performed on an Avida 120 hematology analyzer. For morphological assessment, peripheral blood smears were stained with Hema III stain (Sigma-Aldrich) for 10 min followed by rinsing in dH2O for 3 min. Images were taken using a 60× objective on a Leica microscope outfitted with a camera.

**Histology**

The mice were euthanized (by CO2 asphyxiation), necropsied and the internal organs were examined grossly. Tissue samples were fixed in 10% neutral buffered formalin, and the bones were decalcified with 10% formic acid. Formalin fixed tissues were processed, embedded in paraffin blocks, cut into 4 µm thick sections, mounted on glass slides, and then stained with filtered 0.1% Mayers Hematoxylin (Sigma) according to manufacturer’s protocol.

***In situ* hybridization**

The FFPE tissue sections were first digested with 5 μg/mL proteinase K for 20 minutes at RT, and were then loaded onto Ventana Discovery Ultra system (Ventana Medical Systems, Inc, Tucson, AZ) for in situ hybridization. The tissue slides were incubated with double-DIG labeled probe for *CCAT2* or control U6 (Exiqon) for 2 hrs at 55° C. The digoxigenins were detected with a polyclonal anti-DIG antibody and alkaline phosphatase conjugated second antibody (Ventana) using NBT-BCIP as the substrate. The signal intensities of *CCAT2* and *RNU6-6P* expression were quantified by using the intensity measurement tools of the Image-Pro Plus software package (Media Cybernetics) as previously described by us in Supplemental reference 12.

**RNA extraction, reverse transcription and real-time qPCR**

Total RNA was extracted from patient samples, mice tissues or cultured cells using Trizol following manufacturer’s protocol (Sigma). Reverse transcription was performed using random hexamers with SuperScriptIII Reverse Polymerase according to manufacturer’s protocol (Invitrogen). Quantitative RT-PCR analysis was performed with SYBR Green using specific primers **(Supplemental Table 1A)**. B2M and PGK1 were used as internal controls. MicroRNA expression was tested using TaqMan microRNA assay (Applied Biosystems). The cDNA was synthesized using TaqMan Reverse Transcription Reagents kit (Applied Biosystems) and then used for quantitative RT-qPCR analysis with TaqMan probes and SsoFast Supermix (Bio-Rad). Relative expression levels were calculated using the 2-ΔΔCt method as previously described us in Supplemental reference 12.

**Genomic instability analysis**

Femur bone marrow *CCAT2-G*, *CCAT2-T* and WT mice was flushed and collected with RPMI medium 1640 + 20% FBS. BM cells were cultured overnight in complete RPMI medium using standard methods. Cells were then exposed to Colcemid (0.04 μg/mL) for 25 min at 37°C and to hypotonic treatment (0.075 M KCl) for 20 min at room temperature, and then were fixed in a methanol and acetic acid mixture (3:1 by volume) for 15 min and washed three times in the fixative. The slides were air-dried, stained in 4% Giemsa, and analyzed for genomic abnormalities. Images were captured using Cytovision Imaging system (Applied Imaging) attached to a Nikon Eclipse 600 microscope. Twenty to thirty karyotypes were prepared from each sample and results were described using the standard chromosome nomenclature for mice.

**Flow Cytometry analysis**

Single-cell suspensions were prepared from bone marrow (from femoral and tibial bones) by passing cells through pre-separation filters (Miltenyi). Cell numbers were subsequently counted, fixed and stained according to standard protocol for FACS. Flow cytometry was performed using LSR Fortessa (BD Bioscience) and analyzed using FlowJo software (Tree Star). Dead cells were excluded by staining them with Ghost Dye (Tonbo Biosciences). Cell doublets were excluded from all analyses. Lin (−) cells were enriched using a Mouse hematopoietic progenitor cell enrichment kit (Stem Cell Technologies). The antibodies (all from eBioscience, Tonbo or Biolegend, **Supplemental Table 1B**) conjugated to FITC, APC, APC-Cy7, PE, PE-Cy7, PercpCy5.5, EFLUOR450, or APC-Cy7 were used for the flow cytometry analysis.

**Mass Cytometry (CyTOF)**

After completion of antibody staining, cells were washed twice with CSM and then incubated overnight in PBS with a 1:5,000 dilution of the iridium intercalator pentamethylcyclopentadienyl-Ir(III)-dipyrido- phenazine (Fluidigm Sciences) and 1.5% paraformaldehyde. Excess intercalator was then removed with one CSM wash and two washes in pure water. Cells were then resuspended in pure water at 1 million cells per mL and mixed with mass standard beads (Fluidigm Sciences). Cell events were acquired on the CyTOF mass cytometer (Fluidigm Sciences) at an event rate of 100 to 300 events per second with instrument-calibrated dual-count detection. After data acquisition, the mass bead signal was used to correct short-term signal fluctuation during the course of each experiment, and bead events were removed. Approximately 100,000 cell events were collected for each sample. The dataset was cleaned and live single cells were exported using Flowjo software (Treestar). Data files were analyzed using Cytofkit package (13). Dimensionality reduction using t-SNE algorithm was performed on each data set, a random selection of 5,000 cells from each sample were included for analysis. Unsupervised FlowSOM algorithm integrated in Cytofkit package was used to define the major clusters within different samples (14). We used heatmaps, displaying the mean expression of each marker, to evaluate marker expression patterns identifying each clusters. No scaling on row or columns was performed.

**Supplemental References**

1. Igarashi K, Itoh-Nakadai A. Orchestration of B lymphoid cells and their inner myeloid by Bach. Curr Opin Immunol 2016;39:136-42.

2. Itoh-Nakadai A, Hikota R, Muto A, Kometani K, Watanabe-Matsui M, Sato Y*, et al.* The transcription repressors Bach2 and Bach1 promote B cell development by repressing the myeloid program. Nat Immunol 2014;15(12):1171-80.

3. Vassiliou GS, Cooper JL, Rad R, Li J, Rice S, Uren A*, et al.* Mutant nucleophosmin and cooperating pathways drive leukemia initiation and progression in mice. Nat Genet 2011;43(5):470-5.

4. Greif PA, Konstandin NP, Metzeler KH, Herold T, Pasalic Z, Ksienzyk B*, et al.* RUNX1 mutations in cytogenetically normal acute myeloid leukemia are associated with a poor prognosis and up-regulation of lymphoid genes. Haematologica 2012;97(12):1909-15.

5. Heckl D, Schwarzer A, Haemmerle R, Steinemann D, Rudolph C, Skawran B*, et al.* Lentiviral vector induced insertional haploinsufficiency of Ebf1 causes murine leukemia. Mol Ther 2012;20(6):1187-95.

6. Kong NR, Davis M, Chai L, Winoto A, Tjian R. MEF2C and EBF1 Co-regulate B Cell-Specific Transcription. PLoS Genet 2016;12(2):e1005845.

7. Gough SM, Chung YJ, Aplan PD. Depletion of cytotoxic T-cells does not protect NUP98-HOXD13 mice from myelodysplastic syndrome but reveals a modest tumor immunosurveillance effect. PLoS One 2012;7(5):e36876.

8. Pridans C, Holmes ML, Polli M, Wettenhall JM, Dakic A, Corcoran LM*, et al.* Identification of Pax5 target genes in early B cell differentiation. J Immunol 2008;180(3):1719-28.

9. Rosinski KV, Fujii N, Mito JK, Koo KK, Xuereb SM, Sala-Torra O*, et al.* DDX3Y encodes a class I MHC-restricted H-Y antigen that is expressed in leukemic stem cells. Blood 2008;111(9):4817-26.

10. Flotho C, Paulun A, Batz C, Niemeyer CM. AKAP12, a gene with tumour suppressor properties, is a target of promoter DNA methylation in childhood myeloid malignancies. Br J Haematol 2007;138(5):644-50.

11. Kim DH, Lee ST, Won HH, Kim S, Kim MJ, Kim HJ*, et al.* A genome-wide association study identifies novel loci associated with susceptibility to chronic myeloid leukemia. Blood 2011;117(25):6906-11.

12. Rigoutsos I, Lee SK, Nam SY, Anfossi S, Pasculli B, Pichler M, *et al*. N-BLR, a primate-specific non-coding transcript leads to colorectal cancer invasion and migration. Genome biology 2017;18(1):98.

13. Chen H, Lau MC, Wong MT, Newell EW, Poidinger M, Chen J. Cytofkit: A Bioconductor Package for an Integrated Mass Cytometry Data Analysis Pipeline. PLoS Comput Biol 2016;12: e1005112.

14. Van Gassen S, Callebaut B, Van Helden MJ, Lambrecht BN, Demeester P, Dhaene T, Saeys Y. FlowSOM: Using self-organizing maps for visualization and interpretation of cytometry data. CytometryA 2015;87: 636-645.
